# Supplementary material
Source: publisher figshare collection journal article supplement (https://plos.figshare.com/articles/dataset/_/1449450)
Supplement: Supplementary file 1 [file 1]

Archive with 2 entries (2 files):
- S1_Fig.pdf
- S1_File.pdf
