# Supplementary material
Source: publisher figshare collection journal article supplement (https://plos.figshare.com/articles/dataset/_/1449450)
Supplement: Supplementary file 1 [file 1 › S1_Fig.pdf]

**S1 Fig: Subject recruitment and follow up flowchart**

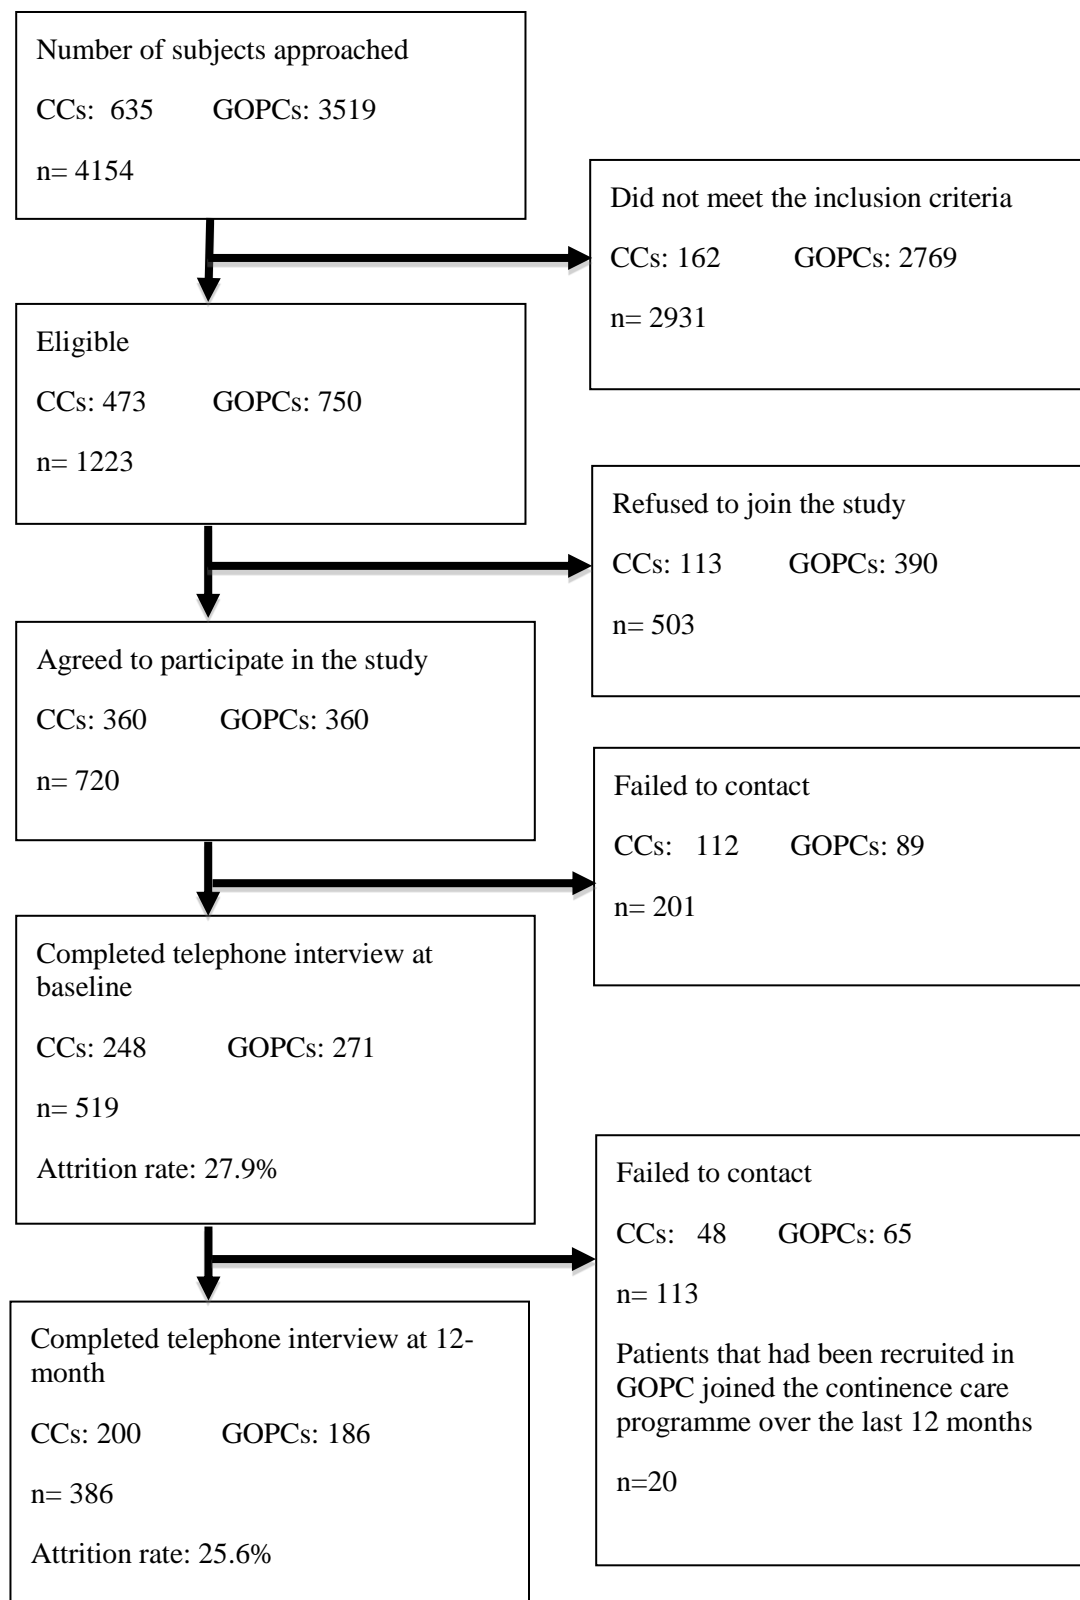

CCs: Continence care clinics

GOPCs: General outpatient clinics
