# Supplementary material
Source: publisher figshare collection journal article supplement (https://plos.figshare.com/articles/dataset/_/1449450)
Supplement: Supplementary file 1 [file 1 › S1_File.pdf]

## S1 File: Screening questionnaire (Modified ICIQ-UI SF)

1. How often do you have urinary problems \*?

- Never ☐ 0
- About once a week or less often ☐ 1
- Two or three times a week ☐ 2
- About once a day ☐ 3
- Several times a day ☐ 4
- All the time ☐ 5

2. We would like to know how much urine you think leaks.

How much urine do you usually leak (whether you wear protection or not)?

- None ☐ 0
- A small amount ☐ 2
- A moderate amount ☐ 4
- A large amount ☐ 6

3. Overall, how much do urinary problems \* interfere with your everyday life?

Please ring a number between 0 (not at all) and 10 (a great deal)

0 1 2 3 4 5 6 7 8 9 10

Total Score: 1+2+3:\_\_\_\_\_

Urinary problems: intermittent stream, incomplete bladder emptying, weak stream, straining, nocturia, urgency, frequency and incontinence etc.
